# Supplementary material
Source: PubMed Central journal article supplement (PMC3686096)
Supplement: NIHMS473751-supplement-1_si_001.pdf [file NIHMS473751-supplement-1_si_001.pdf]

Supporting Figures for "Polymorph-specific kinetics and thermodynamics of  $\beta$ -amyloid fibril growth", by W. Qiang, K. Kelley, and R. Tycko

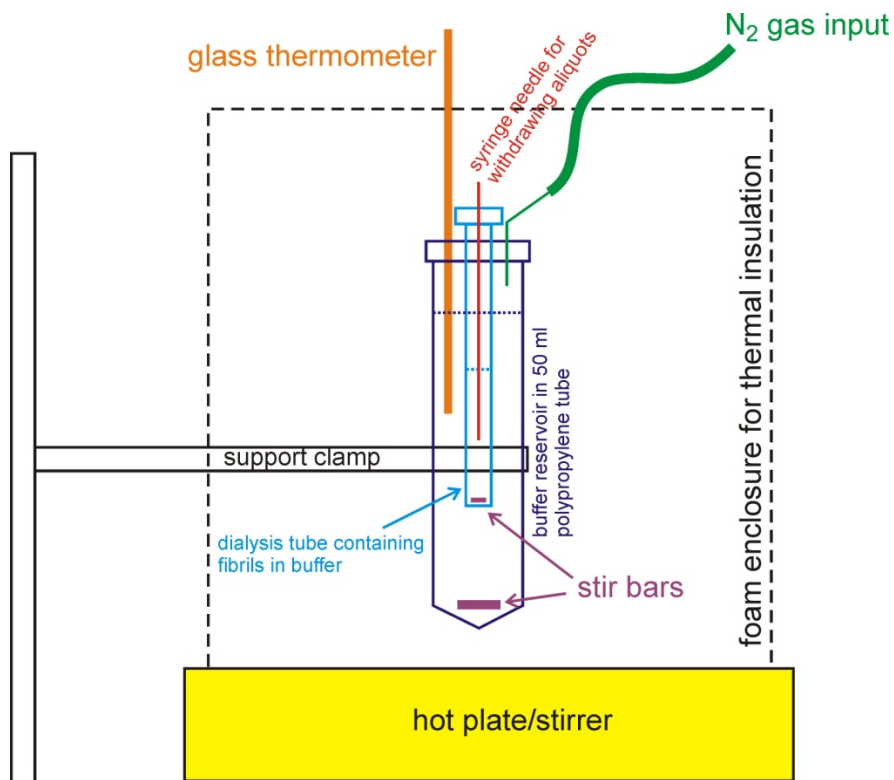

Figure S1: Schematic diagram of dialysis apparatus used for measurements of fibril shrinkage and quasi-equilibrium solubility. In the latter measurements, a larger quantity of fibrils was placed in the dialysis tube, and aliquots were taken from the buffer reservoir (rather than from the dialysis tube) for UV/HPLC analysis.

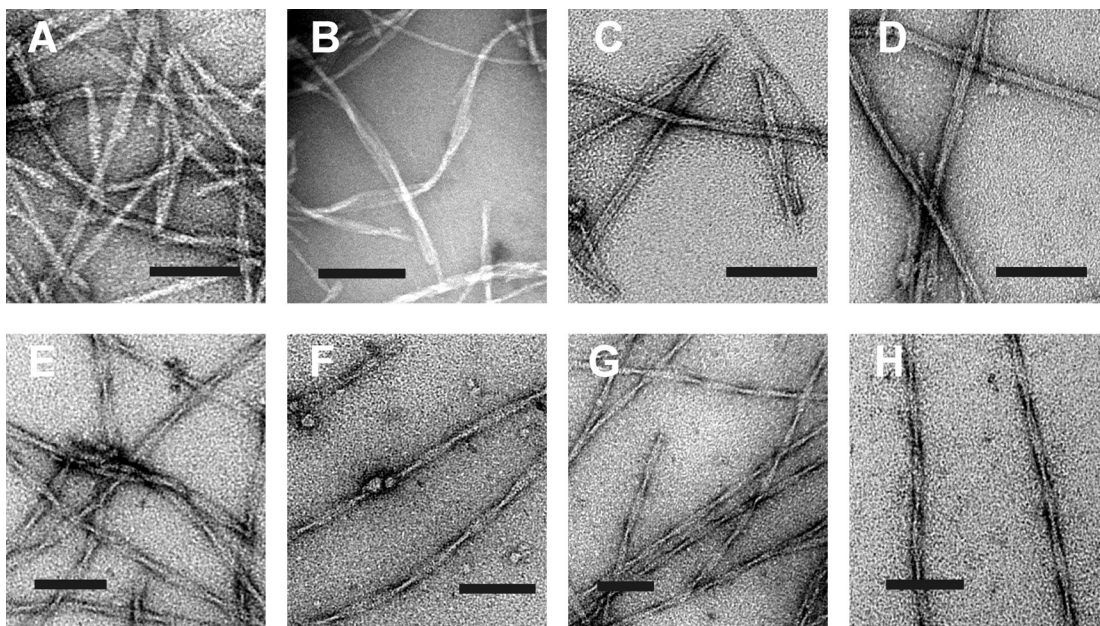

Figure S2: Representative TEM images of  $\alpha$  (A-D) and  $\beta$  (E-H)  $A\beta_{1-40}$  fibrils used as the source of seeds for fibril elongation measurements. Scale bars are 100 nm.

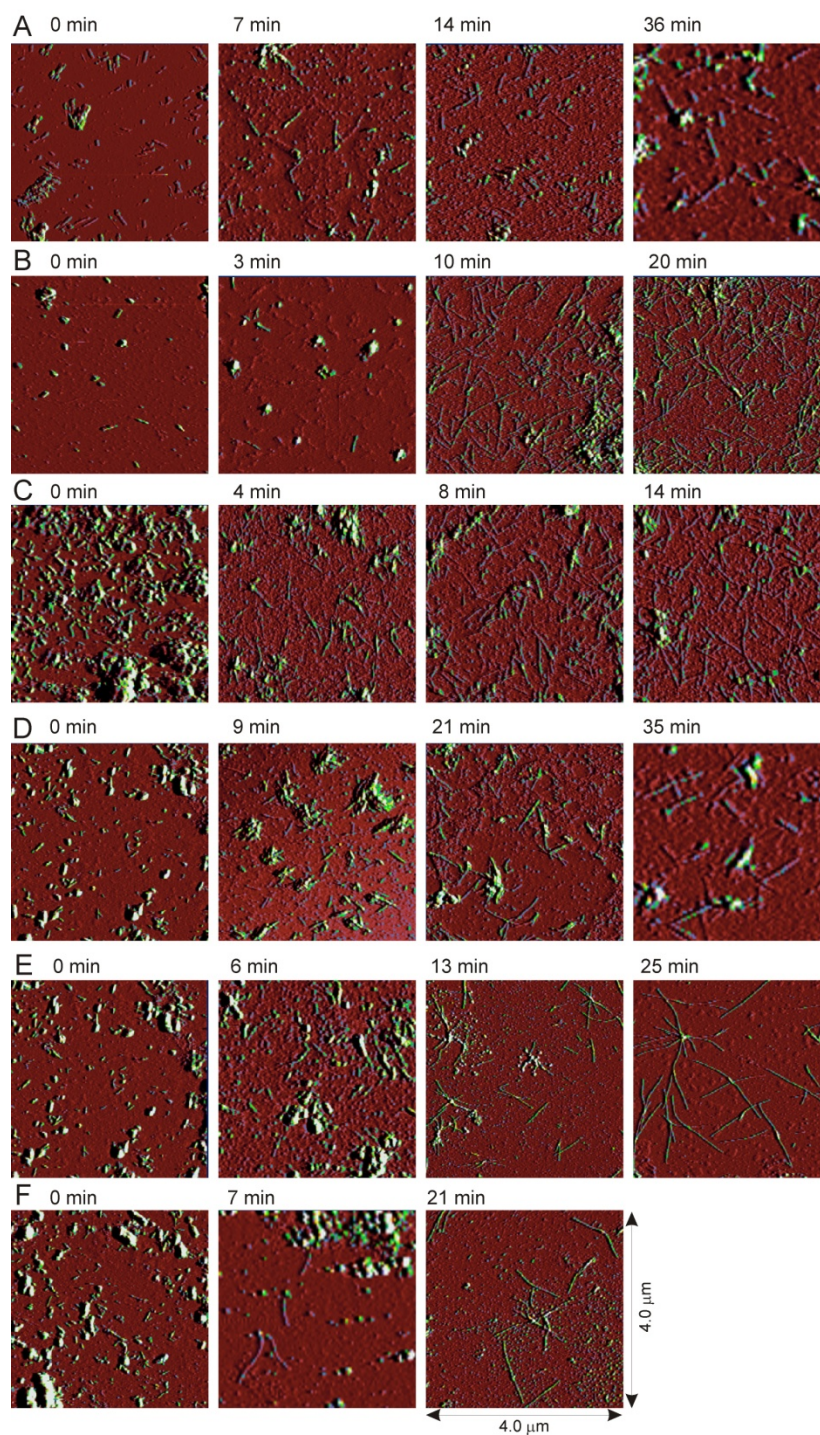

Figure S3: Representative AFM images ( $4.0\ \mu\text{m} \times 4.0\ \mu\text{m}$ ) from elongation measurements at  $24^\circ\text{C}$ . (A,B,C)  $\alpha$  fibril seeds with soluble  $A\beta_{1-40}$  concentrations of  $25\ \mu\text{M}$ ,  $50\ \mu\text{M}$ , and  $75\ \mu\text{M}$ , respectively. (D,E,F)  $\alpha$  fibril seeds with soluble  $A\beta_{1-40}$  concentrations of  $25\ \mu\text{M}$ ,  $50\ \mu\text{M}$ , and  $75\ \mu\text{M}$ , respectively.

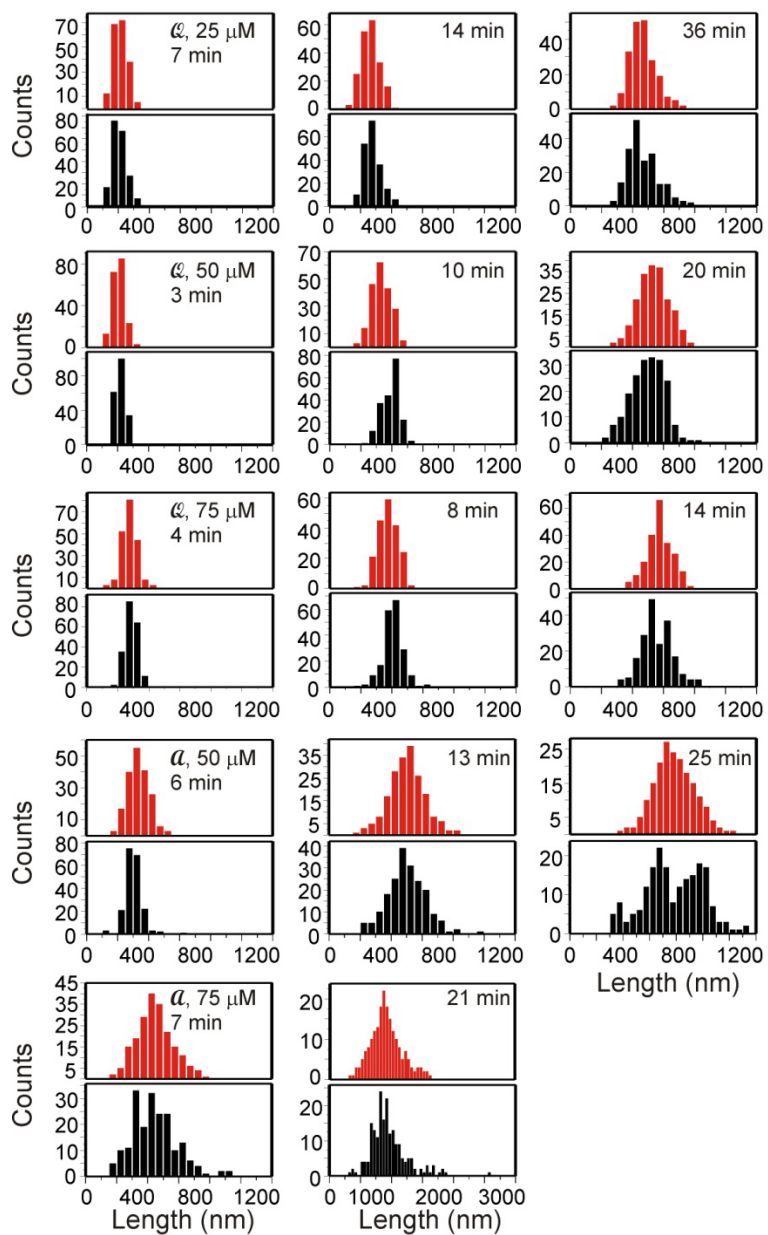

Figure S4: Experimental (black) and best-fit simulated (red) histograms of fibril length distributions at 24° C.  $\mathcal{Q}$  and  $\mathcal{A}$  represent "quiescent" and "agitated" fibril seeds.

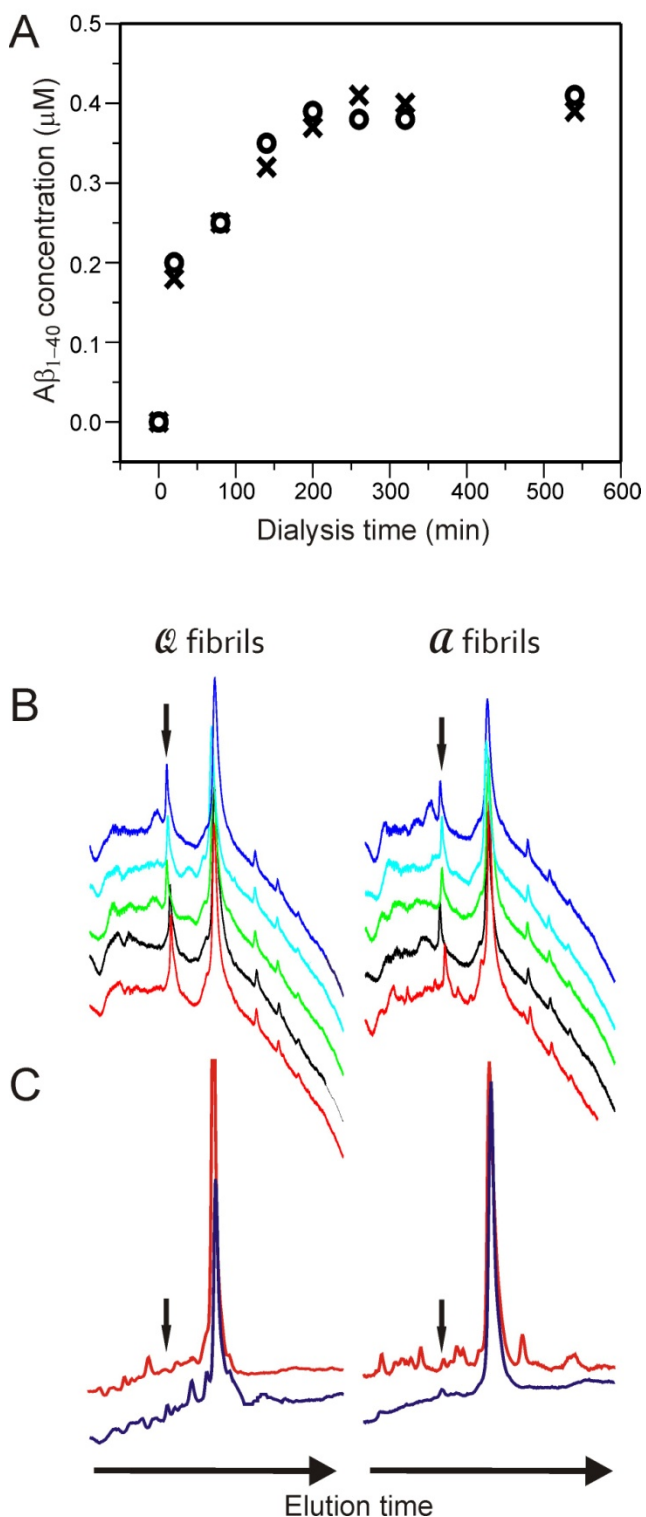

Figure S5: (A) Control experiment to show that monomeric A $\beta_{1-40}$  diffuses through the dialysis membrane used in quasi-equilibrium solubility measurements within 3 hr. Concentration in the buffer reservoir outside the dialysis tube is plotted as a function of dialysis time. Initial concentration of monomeric A $\beta_{1-40}$  inside the dialysis tube was 20  $\mu$ M. Inner and outer buffer volumes were 1 ml and 45 ml, respectively. Circles and crosses represent two independent measurements. (B) HPLC traces from five independent measurements of quasi-equilibrium A $\beta_{1-40}$  monomer concentrations in the presence of  $\alpha$  and  $\alpha$  fibrils at 24° C. Arrows indicate the position of the A $\beta_{1-40}$  elution peaks, which were identified by MALDI-TOF mass spectrometry. (C) HPLC traces from two independent attempts to measure quasi-equilibrium monomer concentrations at 37° C. The concentrations were below the reliable detection limit.



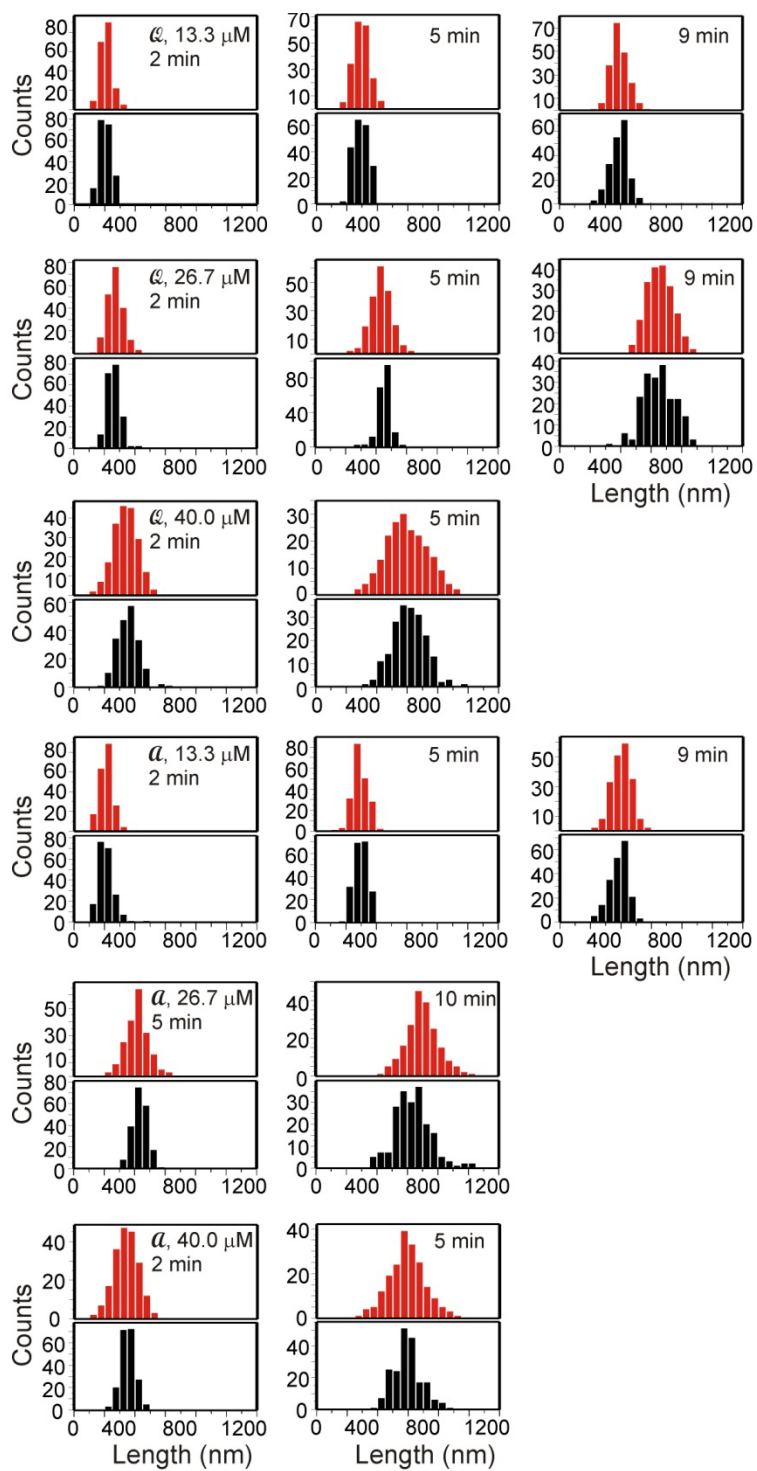

Figure S6: Experimental (black) and best-fit simulated (red) histograms of fibril length distributions at 37°C.  $\mathcal{Q}$  and  $\mathcal{A}$  represent "quiescent" and "agitated" fibril seeds.

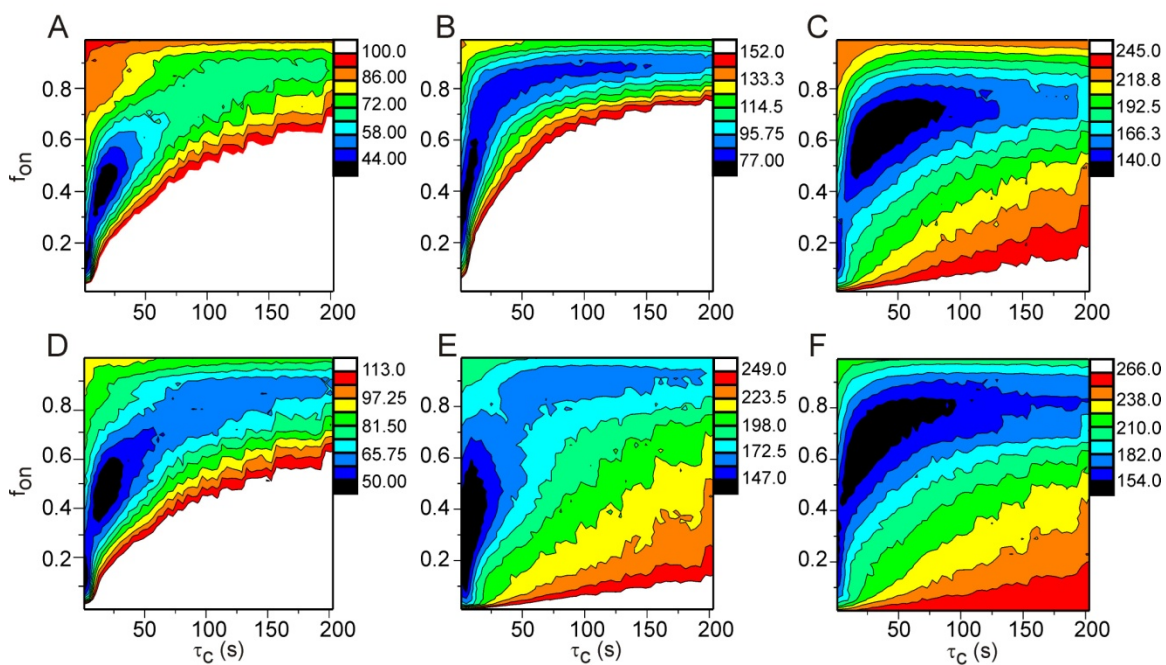

Figure S7: Same as Figure 6 of the main text, but for fibril elongation measurements at 37° C. (A,B,C)  $\mathcal{Q}$  fibrils with 13  $\mu$ M, 27  $\mu$ M, and 40  $\mu$ M soluble A $\beta_{1-40}$  concentrations, respectively. (D,E,F)  $\alpha$  fibrils with 13  $\mu$ M, 27  $\mu$ M, and 40  $\mu$ M soluble A $\beta_{1-40}$  concentrations, respectively.

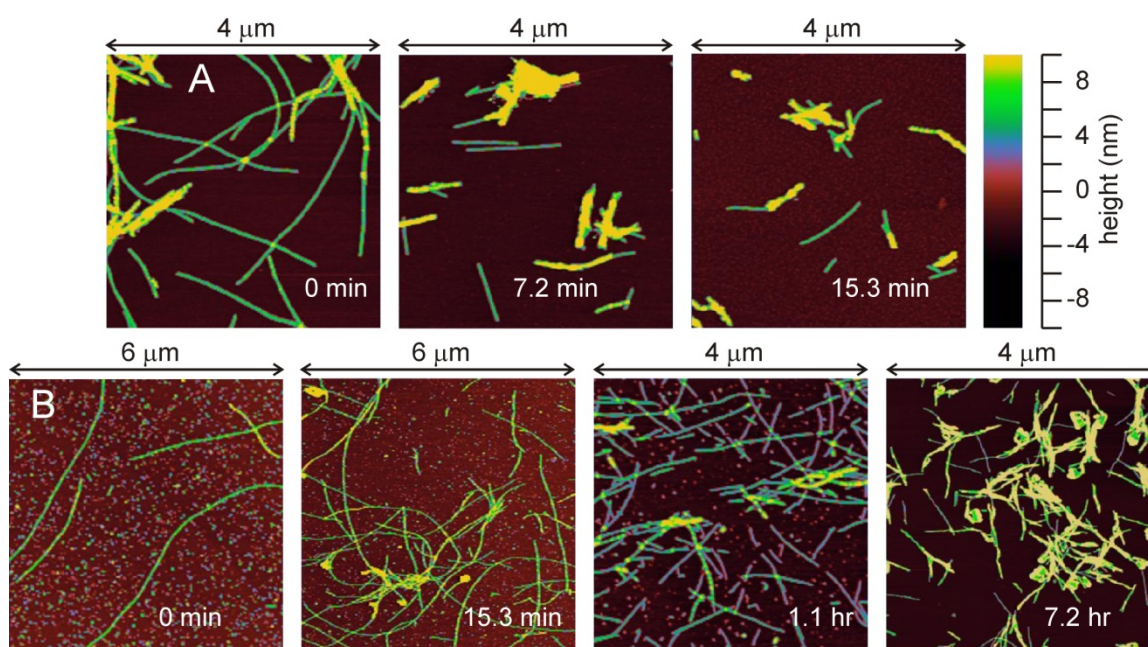

Figure S8: Polymorph-specific susceptibility to fragmentation by shear forces. Either  $\alpha$  (A) or  $\beta$  (B)  $A\beta_{1-40}$  fibrils were suspended in incubation buffer in a 2 ml glass vial. A stir bar (6.6 mm length) was placed in the bottom of the vial and rotated at maximum speed with a stirrer plate (Corning model PC-410, setting 10) at 24° C. Aliquots were taken at indicated times, adsorbed to mica, and imaged in air by AFM. Height images are shown. Fragmentation of  $\alpha$  fibrils was significantly more rapid than fragmentation of  $\beta$  fibrils.
